# Supplementary material
Source: Frontiers journal article supplement (https://www.frontiersin.org/articles/192215)
Supplement: Data_Sheet_1.PDF [file Data_Sheet_1.PDF]

## 1 Appendix

| Studies applying PRO instruments in TB          | Study Type        | Country  |
|-------------------------------------------------|-------------------|----------|
| Adeyeye et al 2014 (Adeyeye et al., 2014)       | cross-sectional   | Nigeria  |
| Aggarwal et al 2013 (Aggarwal et al., 2013)     | longitudinal      | India    |
| Atif et al 2014 (Atif et al., 2014b)            | cross-sectional   | Malaysia |
| Atif et al 2014 (Atif et al., 2014a)            | longitudinal      | Malaysia |
| Atif et al 2013 (Atif et al., 2013)             | cross-sectional   | Malaysia |
| Awaisu et al 2012 (Awaisu et al., 2012)         | cross-sectional   | Malaysia |
| Babikako et al 2010 (Babikako et al., 2010)     | cross-sectional   | Uganda   |
| Balgude et al 2012 (Balgude and Sontakke, 2012) | longitudinal      | India    |
| Bauer et al 2013 (Bauer et al., 2013)           | systematic Review | NA       |
| Chamla 2004 (Chamla, 2004)                      | longitudinal      | China    |
| Chung et al 2012 (Chung et al., 2012)           | longitudinal      | Taiwan   |

|                                                            |                          |                     |
|------------------------------------------------------------|--------------------------|---------------------|
| <b>Corless et al 2009 (Corless et al., 2009)</b>           | <b>cross-sectional</b>   | <b>South Africa</b> |
| <b>Dhingra and Rajpal 2005 (Dhingra and Rajpal, 2005)</b>  | <b>longitudinal</b>      | <b>India</b>        |
| <b>Dhuria et al 2009 (Dhuria et al., 2009)</b>             | <b>longitudinal</b>      | <b>India</b>        |
| <b>Dion et al 2004 (Dion et al., 2004)</b>                 | <b>cross-sectional</b>   | <b>Canada</b>       |
| <b>Dujaili et al 2015 (Dujaili et al., 2015)</b>           | <b>longitudinal</b>      | <b>Iraq</b>         |
| <b>Guo et al 2009 (Guo et al., 2009)</b>                   | <b>systematic review</b> | <b>NA</b>           |
| <b>Guo et al 2008 (Guo N, 2008)</b>                        | <b>cross-sectional</b>   | <b>Canada</b>       |
| <b>Husain et al 2008 (Husain MO, 2008)</b>                 | <b>cross-sectional</b>   | <b>Pakistan</b>     |
| <b>Issa et al 2009 (Bauer et al., 2013)</b>                | <b>cross-sectional</b>   | <b>Nigeria</b>      |
| <b>Kittikraisak et al 2012 (Kittikraisak et al., 2012)</b> | <b>cross-sectional</b>   | <b>Thailand</b>     |
| <b>Kruijshaar et al 2010 (Kruijshaar et al., 2010)</b>     | <b>longitudinal</b>      | <b>UK</b>           |
| <b>Louw et al 2012 (Louw et al., 2012)</b>                 | <b>cross-sectional</b>   | <b>South Africa</b> |
| <b>Maguire et al 2009 (Maguire et al., 2009)</b>           | <b>longitudinal</b>      | <b>Indonesia</b>    |

|                                                             |                        |                     |
|-------------------------------------------------------------|------------------------|---------------------|
| <b>Mamani et al 2014 (Mamani et al., 2014)</b>              | <b>longitudinal</b>    | <b>Western Iran</b> |
| <b>Marra et al 2008 (Marra et al., 2008)</b>                | <b>longitudinal</b>    | <b>Canada</b>       |
| <b>Masumoto et al 2014 (Masumoto et al., 2014)</b>          | <b>cross-sectional</b> | <b>Philippines</b>  |
| <b>McInerney et al 2007 (McInerney et al., 2007)</b>        | <b>cross-sectional</b> | <b>South Africa</b> |
| <b>Muniyandi et al 2007 (Muniyandi et al., 2007)</b>        | <b>cross-sectional</b> | <b>India</b>        |
| <b>Naidoo and Mwaba 2010 (Naidoo and Mwaba, 2010)</b>       | <b>qualitative</b>     | <b>South Africa</b> |
| <b>Othman et al 2011 (Othman, 2011)</b>                     | <b>cross-sectional</b> | <b>Yemen</b>        |
| <b>Pasipanodya et al 2007 (Pasipanodya et al., 2007a)</b>   | <b>cross-sectional</b> | <b>USA</b>          |
| <b>Pasipanodya et al 2007 B (Pasipanodya et al., 2007b)</b> | <b>cross-sectional</b> | <b>USA</b>          |
| <b>Peltzer et al 2013 (Peltzer et al., 2013)</b>            | <b>cross-sectional</b> | <b>South Africa</b> |
| <b>Peltzer et al 2012 (Peltzer K, 2012)</b>                 | <b>cross-sectional</b> | <b>South Africa</b> |
| <b>Rajeswari et al 2005 (Rajeswari et al., 2005)</b>        | <b>longitudinal</b>    | <b>India</b>        |

|                                       |                 |           |
|---------------------------------------|-----------------|-----------|
| Ralph et al 2013 (Ralph et al., 2013) | longitudinal    | Indonesia |
| Yin et al 2012 (Yin et al., 2012)     | cross-sectional | China     |

2 Table 1 lists all studies included in the development of study design.

| PRO measures applied in assessment of HRQOL                      | Number of single studies identified | Countries                                                                          |
|------------------------------------------------------------------|-------------------------------------|------------------------------------------------------------------------------------|
| Short-Form-36 (SF-36)                                            | 18                                  | Uganda, Canada, China, South Africa, UK, India, Western Iran, Malaysia, USA, India |
| World Health Organization's Quality of Life - BREF (WHOQOL-BREF) | 5                                   | India, Taiwan, Nigeria                                                             |
| EuroQoL (EQ-5D)                                                  | 4                                   | Canada, UK, Thailand, Malaysia                                                     |
| Beck Depression Inventory (BDI)                                  | 4                                   | South Africa, Turkey, Canada                                                       |
| Kessler-10                                                       | 4                                   | South Africa, Ethiopia                                                             |
| St. George's Respiratory Questionnaire (SGRQ)                    | 4                                   | USA, Indonesia                                                                     |
| Standard Gamble (SG)                                             | 3                                   | Canada, UK, Turkey                                                                 |
| Visual Analogue Scale (VAS)                                      | 3                                   | Canada, Thailand                                                                   |
| General Health Questionnaire 12 (GHQ-12)                         | 2                                   | Turkey, Nigeria                                                                    |
| Mood Adjective Check List Short Form (MACL)                      | 2                                   | Sweden                                                                             |
| Severe Respiratory Insufficiency Questionnaire (SRI)             | 2                                   | Spain, Germany                                                                     |
| SF-6D utility score                                              | 2                                   | Canada                                                                             |

|                                                                            |   |                       |
|----------------------------------------------------------------------------|---|-----------------------|
| <b>Sickness Impact Profile (SIP)</b>                                       | 2 | Sweden                |
| <b>State-Trait Anxiety Inventory</b><br><b>Short Form (STAI-6)</b>         | 2 | UK, Turkey            |
| <b>Center for Epidemiologic Studies</b><br><b>Depression Scale (CES-D)</b> | 2 | UK, USA               |
| <b>Duke Health Profile (DUKE)</b>                                          | 2 | Colombia, Philippines |
| <b>DR-12</b>                                                               | 2 | India, Yemen          |
| <b>Hospital Anxiety and Depression</b><br><b>Scale (HADS)</b>              | 1 | Pakistan              |
| <b>Short-Form 12 (SF-12)</b>                                               | 1 | South Africa          |
| <b>Beck Depression Inventory (BDI)</b><br><b>Short Form</b>                | 1 | South Africa          |
| <b>Brief Disability Questionnaire</b><br><b>(BDQ)</b>                      | 1 | Turkey                |
| <b>Dysfunctional Analysis</b><br><b>Questionnaire (DAQ)</b>                | 1 | India                 |
| <b>Health Utilities Index 2 (HUI 2)</b>                                    | 1 | Canada                |
| <b>Health Utilities Index 3 (HUI 3)</b>                                    | 1 | Canada                |
| <b>Life Satisfaction Index Z</b>                                           | 1 | China                 |
| <b>Mental Health Index (MHI-5)</b>                                         | 1 | USA                   |
| <b>Modified Version of SF-36</b>                                           | 1 | India                 |
| <b>Modified St. Georges</b><br><b>Respiratory Questionnaire</b>            | 1 | Indonesia             |
| <b>Present State Examination (PSE)</b>                                     | 1 | Nigeria               |
| <b>Rosenberg Self-Esteem Scale</b><br><b>(RSE)</b>                         | 1 | South Africa          |
| <b>Self-Rating Anxiety Scale (SAS)</b>                                     | 1 | China                 |
| <b>Sheehan Disability Scale (SDS)</b>                                      | 1 | China                 |

|                                                                                     |   |              |
|-------------------------------------------------------------------------------------|---|--------------|
| <b>Social Support Rating Scale (SSRS)</b>                                           | 1 | China        |
| <b>Symptoms Check List (SCL-90)</b>                                                 | 1 | China        |
| <b>Voice Handicap Index-10 (VHI-10)</b>                                             | 1 | Turkey       |
| <b>Quality of Life Questionnaire (QLQ)</b>                                          | 1 | Turkey       |
| <b>Short-Form 8 (SF-8)</b>                                                          | 1 | Philippines  |
| <b>Medical Research Council (MRC) dyspnea scale</b>                                 | 1 | Philippines  |
| <b>Primary Care PTSD screen</b>                                                     | 1 | South Africa |
| <b>World Health Organization's Quality of Life - HIV (WHOQOL-HIV)</b>               | 1 | Ethiopia     |
| <b>The Functional Assessment of Chronic Illness Therapy-Tuberculosis (FACIT-TB)</b> | 1 | Iraq         |
| <b>Illness Perception Questionnaire (IPQ)</b>                                       | 1 | Pakistan     |
| <b>Patient Health Questionnaire (PHQ-9)</b>                                         | 1 | Nigeria      |

3 Table 2 lists all HRQOL measures identified and extracted from studies included

| <b>PRO measures applied in adherence assessment</b> | <b>Number of studies</b> | <b>Country</b> |
|-----------------------------------------------------|--------------------------|----------------|
| <b>Morisky Medication Adherence Scale (MMAS)</b>    | 2                        | South Africa   |
| <b>Perceived Nonadherence Scale (ACTG)</b>          | 1                        | South Africa   |

|                                              |          |              |
|----------------------------------------------|----------|--------------|
| <b>TB medication adherence scale (TBMAS)</b> | <b>1</b> | <b>China</b> |
|----------------------------------------------|----------|--------------|

4 Table 3 lists all adherence measures identified and extracted from published studies included.

5

| <b>PRO HRQOL measures</b>                                                                 | <b>Pathology/Disease</b>                                           |
|-------------------------------------------------------------------------------------------|--------------------------------------------------------------------|
| <b>Baseline and Transition Dyspnea Indexes (BDI-TDI)</b>                                  | Pulmonary Disease, Chronic Obstructive ,Respiratory Tract Diseases |
| <b>Clinical COPD Questionnaire (CCQ)</b>                                                  | Pulmonary Disease, Chronic Obstructive ,Respiratory Tract Diseases |
| <b>Chronic Respiratory Disease Questionnaire Self-Administered Standardized (CRQ-SAS)</b> | Pulmonary Disease, Chronic Obstructive ,Respiratory Tract Diseases |
| <b>Inhaled Corticosteroid Questionnaire (ICQ)</b>                                         | Pulmonary Disease, Chronic Obstructive ,Respiratory Tract Diseases |
| <b>St George's Respiratory Questionnaire (SGRQ)</b>                                       | Pulmonary Disease, Chronic Obstructive ,Respiratory Tract Diseases |
| <b>Asthma Control Diary (ACD)</b>                                                         | Respiratory Tract Diseases                                         |
| <b>Asthma Control Questionnaire (ACQ)</b>                                                 | Respiratory Tract Diseases                                         |
| <b>Asthma Control Test (ACT)</b>                                                          | Respiratory Tract Diseases                                         |
| <b>Asthma Quality of Life Questionnaire (AQLQ)</b>                                        | Respiratory Tract Diseases                                         |
| <b>Community-Acquired Pneumonia Symptom questionnaire (CAP-Sym)</b>                       | Respiratory Tract Diseases                                         |
| <b>EORTC Quality of Life Questionnaire - Lung Cancer Module (EORTC-QLQ LC13)</b>          | Respiratory Tract Diseases                                         |
| <b>Geriatric Depression Scale (GDS)</b>                                                   | Psychiatry/Psychology                                              |
| <b>Hospital Anxiety and Depression scale (HADS)</b>                                       | Psychiatry/Psychology                                              |
| <b>Inventory of Depressive Symptomatology (IDS-SR and IDS-C)</b>                          | Psychiatry/Psychology                                              |
| <b>Montgomery-Asberg Depression Rating Scale</b>                                          | Psychiatry/Psychology                                              |

|                                              |                       |
|----------------------------------------------|-----------------------|
| (MADRS)                                      |                       |
| Quick Inventory of Depressive Symptomatology | Psychiatry/Psychology |
| (QIDS-SR and QIDS-C)                         |                       |
| Quality of Life in Depression Scale (QLDS)   | Psychiatry/Psychology |

Table 4 presents 17 instruments for HRQOL assessment in the indications pulmonary, respiratory and psychological diseases and linguistically validated for English in South Africa, accessed from PROQOLID database.

### **Description of Selected HRQOL and Adherence PROMs**

The following section provides a description of the PROMs applied to evaluate HRQOL and medication adherence in TB. Information was derived from PROQOLID database (PROQOLID) for EQ-5D, SF-12v2, SGRQ and HADS and from the developer of MMAS Prof Morisky for the MMAS instrument.

#### ***EQ-5D-5L (provided through EuroQol)***

EQ-5D (Euroqol) assesses health outcomes and is widely used as a utility index for estimating QALYs in cost-effectiveness studies. EQ-5D comprises 5 domains/items

- Mobility
- Self-care
- Usual activities
- Pain/discomfort
- Anxiety/depression

and one vertical visual analogue scale (VAS 20 cm). Each item allows five levels of severity of response ranging from 'no problems' to 'extreme problems'. Higher scores indicate better HRQOL. The VAS records the respondent's self-rated health on a 20 cm vertical, visual analogue scale with endpoints labelled 'the best health you can imagine' and 'the worst health you can imagine'. This information is used as quantitative measure of health as judged by the individual respondents. Index-based values (utilities) are calculated from EQ-5D-5L by deriving values from country-specific value sets. Such value-sets for EQ-5D-5L are currently under development. A crosswalk between the 5L and 3L of EQ-5D is available for 10 countries, including Zimbabwe as only African country. Value sets for South Africa are not available for any version of EQ-5D. The completion time for EQ-5D takes a few minutes. Reliability, validity and ability to detect change are approved (PROQOLID) A minimal important difference (MID) for EQ-5D-3L is approved with Mean MID = 0.074 (range - 0.011 - 0.140) and MID = 7 for VAS scores (Walters, 2005).

#### ***Short-Form 12 (SF-12) (Author Ware John E, provided through Quality Metrics)***

SF-12 is an abbreviated version of SF-36 containing 12 items over 8 domains:

- Physical functioning (PF) with 2 items
- Role physical (RP) with 2 items
- Bodily pain (BP) with 1 item



- General health (GH) with 1 item
- Vitality (VT) with 1 item
- Social functioning (SF) with 1 item
- Role emotional (RE) with 2 items
- Mental health (MH) with 2 items

Domains can be aggregated into composite summary scores for physical and mental state, referred to as Physical Component Score (PCS-12) and Mental Component Score (MCS-12). PCS-12 includes PF, RP, BP, and GH domains, MCS-12 include VT, SF, RE and MH domains. Scoring ranges from 0 to 100; greater scores represent better HRQOL. The completion time for SF-12v2 is 2 minutes. Reliability, validity and ability to detect change are approved (PROQOLID). A minimal important difference for SF-12v2 is not defined; however a minimum meaningful difference for SF-36 is mentioned as > 3 point change (Maruish, 2009). SF-36 and SF-12v2 are comparable in their outcomes and a minimum meaningful difference of > 3 points can be considered for SF-12v2 (Maruish ME, 2009).

***St. George's Respiratory Questionnaire (SGRQ) (Author Jones Paul W, provided through The St. George's University of London Medical School)***

A disease-specific instrument designed to assess patients with respiratory tract diseases and immune system diseases, especially asthma, pulmonary diseases, and chronic obstructive disease. SGRQ comprises 50 items over 3 domains (symptoms, activity, and impacts on daily life) over two parts. Part I covers symptoms (several scales) and Part II covers activity and impacts on daily life (dichotomous true/false) except the last question (4-point Likert scale). The Symptom Component Score is calculated from questions 1-8, the Activity Component Score is calculated from questions 11 and 15, and the Impacts Component Score is calculated from questions 9-10, 12-14, and 16-17. Scores are scaled from 0 to 100, with higher scores indicating worse HRQOL. The completion time for SGRQ is 10 minutes. Reliability, validity and ability to detect change are approved (PROQOLID). A minimal important difference (MID) for SGRQ is defined as improvement of 4 points on the separate domains and the total score (Jones, 2005).

***Hospital Anxiety and Depression Scale (HADS) (Authors Snaith RP and Zigmond AS, provided through GL Assessment)***

HADS is an instrument applied in psychology/psychiatry to detect states of anxiety and depression. HADS comprises 14 items over 2 dimensions

- Anxiety with 7 items
- Depression with 7 items

Scores for each item range from 0 to 3, with higher scores indicating worse HRQOL (i.e. more anxiety and depression). The anxiety subscale scoring ranges from 0-21 (8-10 mild anxiety, 11-14 moderate anxiety, 15-21 severe anxiety). The completion time for HADS is 2-5 minutes. Reliability, validity and ability to detect change are approved (PROQOLID). A minimal important difference (MID) for HADS has not been evaluated. A MID was observed for COPD with a value of 1.5 points corresponding to a change from baseline of 20% and informed by both anchor- and distribution-based methods (Puhan et al., 2008).

### ***Morisky Medication Adherence Scale (MMAS-8) (Author Morisky DE)***

MMAS-8 is being used in the assessment of self reported medication taking behaviour (Morisky, 2008a; Krousel-Wood, 2009; Morisky and DiMatteo, 2011). The scale is a generic measure assessing long-term chronic and infectious medical regimens, such as high blood pressure, diabetes, tuberculosis, HIV, elevated serum lipids, osteoporosis, immunosuppressant medication. It is a reliable and valid indicator to assess self reported medication-taking behaviour, including several levels of criterion related validity (blood pressure control, HgA1c) discriminant validity (social desirability) and persistence using pharmacy fills as a criterion. MMAS has a high sensitivity of 93% to identify low adherence and is a simple scale to identify and monitor adherence (Morisky, 2008b). The MMAS-8 scale ranges from 0 to 8.0; total scores are interpreted in the following way:

- Low adherence <6.0
- Medium adherence 6.0 – 8.0
- High adherence =8.0

Use of the ©MMAS is protected by US copyright laws. Permission for use is required. A license agreement is available from: Donald E. Morisky, ScD, ScM, MSPH, Professor, Department of Community Health Sciences, UCLA School of Public Health, 650 Charles E. Young Drive South, Los Angeles, CA 90095-1772.

### **Reference List**

- Adeyeye, O.O., Ogunleye, O.O., Coker, A., Kuyinu, Y., Bamisile, R.T., Ekrikpo, U., and Onadeko, B. (2014). Factors influencing quality of life and predictors of low quality of life scores in patients on treatment for pulmonary tuberculosis: a cross sectional study. *Journal of Public Health in Africa* 5. doi: 10.4081/jphia.2014.366.
- Aggarwal, A.N., Gupta, D., Janmeja, A.K., and Jindal, S.K. (2013). Assessment of health-related quality of life in patients with pulmonary tuberculosis under programme conditions. *Int J Tuberc Lung Dis* 17, 947-953. doi: 10.5588/ijtld.12.0299.
- Atif, M., Sulaiman, S.A., Shafie, A.A., Asif, M., and Ahmad, N. (2013). SF-36v2 norms and its' discriminative properties among healthy households of tuberculosis patients in Malaysia. *Qual Life Res* 22, 1955-1964. doi: 10.1007/s11136-012-0337-x.
- Atif, M., Sulaiman, S.A., Shafie, A.A., Asif, M., Sarfraz, M.K., Low, H.C., and Babar, Z.U. (2014a). Impact of tuberculosis treatment on health-related quality of life of pulmonary tuberculosis patients: a follow-up study. *Health Qual Life Outcomes* 12, 19. doi: 10.1186/1477-7525-12-19.
- Atif, M., Toghrayee, Z., Sulaiman, S.A.S., Shafie, A.A., Low, H.C., and Babar, Z.-U.-D. (2014b). Missing Data Analysis in Longitudinal Studies: Findings from a Quality of

120 Life Study in Malaysian Tuberculosis Patients. *Applied Research in Quality of Life* 10,  
121 95-105. doi: 10.1007/s11482-014-9302-x.

122 Awaisu, A., Haniki Nik Mohamed, M., Noordin, N.M., Muttalif, A.R., Aziz, N.A., Syed  
123 Sulaiman, S.A., and Mahayiddin, A.A. (2012). Impact of connecting tuberculosis  
124 directly observed therapy short-course with smoking cessation on health-related  
125 quality of life. *Tob Induc Dis* 10, 2. doi: 10.1186/1617-9625-10-2.

126 Babikako, H.M., Neuhauser, D., Katamba, A., and Mupere, E. (2010). Feasibility, reliability  
127 and validity of health-related quality of life questionnaire among adult pulmonary  
128 tuberculosis patients in urban Uganda: cross-sectional study. *Health Qual Life*  
129 *Outcomes* 8, 93. doi: 10.1186/1477-7525-8-93.

130 Balgude, A., and Sontakke, S. (2012). Study of impact of antitubercular therapy on quality of  
131 life. *Indian J Med Sci* 66, 71-77. doi: 10.4103/0019-5359.110911.

132 Bauer, M., Leavens, A., and Schwartzman, K. (2013). A systematic review and meta-analysis  
133 of the impact of tuberculosis on health-related quality of life. *Qual Life Res* 22, 2213-  
134 2235. doi: 10.1007/s11136-012-0329-x.

135 Chamla, D. (2004). The assessment of patients' health-related quality of life during  
136 tuberculosis treatment in Wuhan, China. *Int J Tuberc Lung Dis* 8, 1100-1106.

137 Chung, W.S., Lan, Y.L., and Yang, M.C. (2012). Psychometric testing of the short version of  
138 the world health organization quality of life (WHOQOL-BREF) questionnaire among  
139 pulmonary tuberculosis patients in Taiwan. *BMC Public Health* 12, 630. doi:  
140 10.1186/1471-2458-12-630.

141 Corless, I.B., Wantland, D., Bhengu, B., McInerney, P., Ncama, B., Nicholas, P.K.,  
142 McGibbon, C., Wong, E., and Davis, S.M. (2009). HIV and tuberculosis in Durban,  
143 South Africa: adherence to two medication regimens. *AIDS Care* 21, 1106-1113. doi:  
144 10.1080/09540120902729932.

145 Dhingra, V.K., and Rajpal, S. (2005). Health related quality of life (HRQL) scoring (DR-12  
146 score) in tuberculosis--additional evaluative tool under DOTS. *J Commun Dis* 37, 261-  
147 268.

148 Dhuria, M., Sharma, N., Narender Pal, S., Ram Chander, J., Saha, R., and Gopal Krishan, I.  
149 (2009). A study of the impact of tuberculosis on the quality of life and the effect after  
150 treatment with DOTS. *Asia Pac J Public Health* 21, 312-320. doi:  
151 10.1177/1010539509336242.

152 Dion, M.J., Tousignant, P., Bourbeau, J., Menzies, D., and Schwartzman, K. (2004).  
153 Feasibility and reliability of health-related quality of life measurements among  
154 tuberculosis patients. *Qual Life Res* 13, 653-665.

155 Dujaili, J.A., Sulaiman, S.A., Hassali, M.A., Awaisu, A., Blebil, A.Q., and Bredle, J.M.  
156 (2015). Health-related quality of life as a predictor of tuberculosis treatment outcomes  
157 in Iraq. *Int J Infect Dis* 31, 4-8. doi: 10.1016/j.ijid.2014.12.004.

- 158 Euroqol *EQ-5D-5L* [Online]. Available: [http://www.euroqol.org/eq-5d-products/eq-5d-](http://www.euroqol.org/eq-5d-products/eq-5d-5l.html)  
159 [5l.html](http://www.euroqol.org/eq-5d-products/eq-5d-5l.html) [Accessed 16 December 2015].
- 160 Guo, N., Marra, F., and Marra, C.A. (2009). Measuring health-related quality of life in  
161 tuberculosis: a systematic review. *Health Qual Life Outcomes* 7, 14. doi:  
162 10.1186/1477-7525-7-14.
- 163 Guo N, Marra, C., Marra F, Moadebi S, Elwood RK, FitzGerald JM (2008). Health state  
164 utilities in latent and active tuberculosis. *Value in Health* 11, 1154-1161.
- 165 Husain MO, Dearman, S., Chaudhry IB, Rizvi N, Waheed W (2008). The relationship  
166 between anxiety, depression and illness perception in tuberculosis patients in Pakistan.  
167 *Clinical Practice and Epidemiology in Mental Health* 4, 1-5. doi: 10.1186/1745-0179-  
168 44.
- 169 Jones, P.W. (2005). St. George's Respiratory Questionnaire: MCID. *Journal of Chronic*  
170 *Obstructive Pulmonary* 2, 75-79. doi: 10.1081/COPD-200050513.
- 171 Kittikraisak, W., Kingkaew, P., Teerawattananon, Y., Yothasamut, J., Natesuwan, S.,  
172 Manosuthi, W., Chongsuvivatwong, V., and Whitehead, S.J. (2012). Health related  
173 quality of life among patients with tuberculosis and HIV in Thailand. *PLoS One* 7,  
174 e29775. doi: 10.1371/journal.pone.0029775.
- 175 Krousel-Wood, M., Islam, T., Webber, L.S., Re, R.N., Morisky, D.E., Muntner, P. (2009).  
176 New Medication Adherence Scale Versus Pharmacy Fill Rates in Seniors with  
177 Hypertension. *THE AMERICAN JOURNAL OF MANAGED CARE* 15.
- 178 Kruijshaar, M.E., Lipman, M., Essink-Bot, M.L., Lozewicz, S., Creer, D., Dart, S., Maguire,  
179 H., and Abubakar, I. (2010). Health status of UK patients with active tuberculosis. *Int*  
180 *J Tuberc Lung Dis* 14, 296-302.
- 181 Louw, J., Peltzer, K., Naidoo, P., Matseke, G., McHunu, G., and Tutshana, B. (2012). Quality  
182 of life among tuberculosis (TB), TB retreatment and/or TB-HIV co-infected primary  
183 public health care patients in three districts in South Africa. *Health Qual Life*  
184 *Outcomes* 10, 77. doi: 10.1186/1477-7525-10-77.
- 185 Maguire, G.P., Anstey, N.M., Ardian, M., Waramori, G., Tjitra, E., Kenangalem, E., Handojo,  
186 T., and Kelly, P.M. (2009). Pulmonary tuberculosis, impaired lung function, disability  
187 and quality of life in a high-burden setting. *Int J Tuberc Lung Dis* 13, 1500-1506.
- 188 Mamani, M., Majzoobi, M.M., Ghahfarokhi, S.M., Esna-Ashari, F., and Keramat, F. (2014).  
189 Assessment of Health-related Quality of Life among Patients with Tuberculosis in  
190 Hamadan, Western Iran. *Oman Med J* 29, 102-105. doi: 10.5001/omj.2014.25.
- 191 Marra, C.A., Marra, F., Colley, L., Moadebi, S., Elwood, R.K., and Fitzgerald, J.M. (2008).  
192 Health-related quality of life trajectories among adults with tuberculosis: differences  
193 between latent and active infection. *Chest* 133, 396-403. doi: 10.1378/chest.07-1494.

- 194 Maruish, M.E., and Kosinski, M. (2009). "A Guide to the Development of Certified Short  
195 Form Survey Interpretation and Reporting Capabilities". Quality Metrics  
196 Incorporated).
- 197 Maruish, M.E., and Kosinski, M. (2009). "A guide to the development of certified short form  
198 survey interpretation and reporting capabilities ", (ed.) Q. Incorporated.).
- 199 Masumoto, S., Yamamoto, T., Ohkado, A., Yoshimatsu, S., Querri, A.G., and Kamiya, Y.  
200 (2014). Factors associated with health-related quality of life among pulmonary  
201 tuberculosis patients in Manila, the Philippines. *Qual Life Res* 23, 1523-1533. doi:  
202 10.1007/s11136-013-0571-x.
- 203 McInerney, P.A., Nicholas, P.K., Wantland, D., Corless, I.B., Ncama, B., Bhengu, B.,  
204 McGibbon, C.A., Davis, S.M., and Gallagher, D.M. (2007). Characteristics of anti-  
205 tuberculosis medication adherence in South Africa. *Appl Nurs Res* 20, 164-170. doi:  
206 10.1016/j.apnr.2006.06.006.
- 207 Morisky, D.E., Ang, A., Krousel-Wood, M., Ward, H.J. (2008a). Predictive Validation of a  
208 Medication Adherence Measure in an Outpatient Setting. *The Journal of Clinical*  
209 *Hypertension* 10, 348-354.
- 210 Morisky, D.E., Ang, A., Krousel-Wood, M., Ward, H.J. (2008b). Predictive Validity of a  
211 Medication Adherence Measure in an Outpatient Setting. *The Journal of Clinical*  
212 *Hypertension* 10, 348-354.
- 213 Morisky, D.E., and DiMatteo, M.R. (2011). Improving the measurement of self-reported  
214 medication nonadherence: Final response. *Journal of Clinical Epidemiology* 64, 262-  
215 263. doi: 10.1016/j.jclinepi.2010.09.010.
- 216 Muniyandi, M., Rajeswari, R., Balasubramanian, R., Nirupa, C., Gopi, P.G., Jaggarajamma,  
217 K., Sheela, F., and Narayanan, P.R. (2007). Evaluation of post-treatment health-related  
218 quality of life (HRQoL) among tuberculosis patients. *Int J Tuberc Lung Dis* 11, 887-  
219 892.
- 220 Naidoo, P., and Mwaba, K. (2010). Helplessness, Depression, and Social Support Among  
221 People Being Treated for Tuberculosis in South Africa. *Social Behavior and*  
222 *Personality: an international journal* 38, 1323-1333. doi:  
223 10.2224/sbp.2010.38.10.1323.
- 224 Othman, Q. (2011). Health related quality of life of pulmonary and extrapulmonary  
225 tuberculosis patients in Yemen. *African Journal of Pharmacy and Pharmacology* 5,  
226 547-553. doi: 10.5897/ajpp11.078.
- 227 Pasipanodya, J.G., Miller, T.L., Vecino, M., Munguia, G., Bae, S., Drewyer, G., and Weis,  
228 S.E. (2007a). Using the St. George respiratory questionnaire to ascertain health quality  
229 in persons with treated pulmonary tuberculosis. *Chest* 132, 1591-1598. doi:  
230 10.1378/chest.07-0755.

- 231 Pasipanodya, J.G., Miller, T.L., Vecino, M., Munguia, G., Garmon, R., Bae, S., Drewyer, G.,  
232 and Weis, S.E. (2007b). Pulmonary impairment after tuberculosis. *Chest* 131, 1817-  
233 1824. doi: 10.1378/chest.06-2949.
- 234 Patient-reported Outcomes and Quality of Life Database (PROQOLID). Mapi Research  
235 Institute. [Online] Available: [www.proqolid.org](http://www.proqolid.org). [Accessed: 12 Feb 2014].
- 236 Peltzer, K., Naidoo, P., Matseke, G., Louw, J., McHunu, G., and Tutshana, B. (2013).  
237 Prevalence of post-traumatic stress symptoms and associated factors in tuberculosis  
238 (TB), TB retreatment and/or TB-HIV co-infected primary public health-care patients  
239 in three districts in South Africa. *Psychology, Health & Medicine* 18, 387-397. doi:  
240 10.1080/13548506.2012.726364.
- 241 Peltzer K, N.P., Matseke G, Louw J, McHunu G, Tutshana B (2012). Prevalence of  
242 psychological distress and associated factors in tuberculosis patients in public primary  
243 care clinics in South Africa. *BMC Psychiatry* 12, 1-10.
- 244 Puhan, M.A., Frey, M., Buchi, S., and Schunemann, H.J. (2008). The minimal important  
245 difference of the hospital anxiety and depression scale in patients with chronic  
246 obstructive pulmonary disease. *Health Qual Life Outcomes* 6, 46. doi: 10.1186/1477-  
247 7525-6-46.
- 248 Rajeswari, R., Muniyandi, M., Balasubramanian, R., and Narayanan, P.R. (2005). Perceptions  
249 of tuberculosis patients about their physical, mental and social well-being: a field  
250 report from south India. *Soc Sci Med* 60, 1845-1853. doi:  
251 10.1016/j.socscimed.2004.08.024.
- 252 Ralph, A.P., Kenangalem, E., Waramori, G., Pontororing, G.J., Sandjaja, Tjitra, E., Maguire,  
253 G.P., Kelly, P.M., and Anstey, N.M. (2013). High morbidity during treatment and  
254 residual pulmonary disability in pulmonary tuberculosis: under-recognised  
255 phenomena. *PLoS One* 8, e80302. doi: 10.1371/journal.pone.0080302.
- 256 Walters, S.J., Brazier, J.E. (2005). Comparison of the minimally important difference for two  
257 health state utility measures: EQ-5D and SF-6D. *Quality of Life Research* 14, 1523-  
258 1532. doi: 10.1007/s11136-004-7713-0.
- 259 Yin, X., Tu, X., Tong, Y., Yang, R., Wang, Y., Cao, S., Fan, H., Wang, F., Gong, Y., Yin, P.,  
260 and Lu, Z. (2012). Development and validation of a tuberculosis medication adherence  
261 scale. *PLoS One* 7, e50328. doi: 10.1371/journal.pone.0050328.

262
